# Supplementary material for: The value of amniotic fluid analysis in patients with suspected clinical chorioamnionitis
Source: publisher site journal article supplement (doi:10.1515/jpm-2018-0306), 2019-02-28
Supplement: Supplementary file 1 [file Appendix 1 Study group with amniotic fluid analysis.pdf › Appendix 1 Study group with amniotic fluid analysis.pdf]

# Appendix 1 Study group with amniotic fluid analysis

| Case | Gestational age at presentation | Signs and symptoms at presentation | Gestational age at delivery | Signs, symptoms and laboratory findings at delivery | Histopathological chorioamnionitis | Justified management |
|------|---------------------------------|------------------------------------|-----------------------------|-----------------------------------------------------|------------------------------------|----------------------|
| 1    | 25 1/7                          | PPROM, fever                       | 25 2/7                      | AF culture +                                        | Yes                                | Yes                  |
| 2    | 27 4/7                          | PTL, UT                            | 27 5/7                      | AF culture +                                        | Yes                                | Yes                  |
| 3    | 34 4/7                          | Unexplained fever                  | 38 2/7                      | AF culture -                                        | No                                 | Yes                  |
| 4    | 20 2/7                          | PTL, UT                            | 21 0/7                      | AF culture -                                        | Yes                                | Yes                  |
| 5    | 34 2/7                          | UT                                 | 39 5/7                      | AF culture -                                        | No                                 | Yes                  |
| 6    | 21 0/7                          | UT, fever                          | 40 1/7                      | AF culture -                                        | No                                 | Yes                  |
| 7    | 21 0/7                          | Short cervix, UT, VD               | Terminated                  | AF culture +                                        | Yes                                | Yes                  |
| 8    | 27 3/7                          | PTL, VD                            | 27 3/7                      | AF culture -                                        | No                                 | No                   |
| 9    | 33 4/7                          | UT, fever                          | 35 0/7                      | AF culture -                                        | No                                 | Yes                  |
| 10   | 33 5/7                          | UT, fever                          | 39 3/7                      | AF culture -                                        | No                                 | Yes                  |
| 11   | 19 4/7                          | UT, fever                          | 38 2/7                      | AF culture -                                        | No                                 | Yes                  |
| 12   | 22 0/7                          | PPROM, VD                          | 24 0/7                      | AF culture +<br>(AF analysis at 24 0/7)             | Yes                                | Yes                  |
| 13   | 22 0/7                          | Cervical insufficiency, VD         | Terminated                  | AF culture +                                        | Yes                                | Yes                  |
| 14   | 19 0/7                          | PPROM, fever, UT                   | Terminated                  | AF culture -                                        | Yes                                | Yes                  |

|    |        |                                                                                   |        |              |     |     |
|----|--------|-----------------------------------------------------------------------------------|--------|--------------|-----|-----|
| 15 | 28 5/7 | PPROM, mild UT                                                                    | 30 0/7 | AF culture - | No  | Yes |
| 16 | 31 1/7 | Fever, diarrhea                                                                   | 39 2/7 | AF culture - | No  | Yes |
| 17 | 29 3/7 | PPROM, VD                                                                         | 33 3/7 | AF culture - | No  | Yes |
| 18 | 23 1/7 | Cervical<br>insufficiency,<br>UT,                                                 | 24 2/7 | AF culture - | No  | Yes |
| 19 | 27 6/7 | PTL, UT                                                                           | 28 0/7 | AF culture + | Yes | Yes |
| 20 | 34 6/7 | Nonreassuring<br>fetal heart<br>tracing, fetal<br>tachycardia,<br>oligohydramnios | 35 6/7 | AF culture - | No  | Yes |
| 21 | 24 4/7 | PPROM, VD                                                                         | 24 4/7 | AF culture - | No  | No  |
| 22 | 35 6/7 | Fever                                                                             | 37 4/7 | AF culture - | No  | Yes |
| 23 | 34 2/7 | Fever, fetal<br>tachycardia                                                       | 41     | AF culture - | No  | Yes |
| 24 | 25 6/7 | Cerclage, UT                                                                      | 28 0/7 | AF culture - | No  | Yes |
| 25 | 32 3/7 | UT                                                                                | 36 0/7 | AF culture - | No  | Yes |
| 26 | 23 5/7 | PPROM, VD                                                                         | 25 0/7 | AF culture - | No  | Yes |
| 27 | 35 4/7 | UT, fever                                                                         | 40     | AF culture - | No  | Yes |

|    |        |                                                       |            |              |     |     |
|----|--------|-------------------------------------------------------|------------|--------------|-----|-----|
| 28 | 26 5/7 | PPROM, VD                                             | 28 0/7     | AF culture - | No  | Yes |
| 29 | 21 1/7 | UT                                                    | 37 6/7     | AF culture - | No  | Yes |
| 30 | 19 6/7 | Cervical<br>insufficiency,<br>vaginal bleeding,<br>VD | 21 5/7     | AF culture - | No  | No  |
| 31 | 23 0/7 | Cervical<br>insufficiency, VD                         | Terminated | AF culture + | Yes | Yes |
| 32 | 33 4/7 | UT, fever                                             | 39 5/7     | AF culture - | No  | Yes |
| 33 | 26 0/7 | UT, fever                                             | 40 4/7     | AF culture - | No  | Yes |
| 34 | 33 0/7 | UT, fever                                             | 37 2/7     | AF culture - | No  | Yes |
| 35 | 31 0/7 | PTL, UT, fever                                        | 31 1/7     | AF culture - | Yes | Yes |
| 36 | 33 0/7 | UT, fever                                             | 36 0/7     | AF culture - | No  | Yes |
| 37 | 24     | Fever                                                 | 36 1/7     | AF culture - | No  | Yes |
| 38 | 28 4/7 | PTL, UT                                               | 28 5/7     | AF culture - | Yes | Yes |
| 39 | 25 5/7 | PTL, UT, fever                                        | 31 0/7     | AF culture - | No  | Yes |

|    |        |                |            |              |     |     |
|----|--------|----------------|------------|--------------|-----|-----|
|    |        |                |            |              |     |     |
| 40 | 23 5/7 | PTL, UT, fever | Terminated | AF culture + | Yes | Yes |
| 41 | 26 5/7 | PPROM, UT      | 34 0/7     | AF culture - | No  | Yes |
| 42 | 29 5/7 | PPROM, UT      | 32 6/7     | AF culture - | No  | Yes |
| 43 | 35 6/7 | Fever          | 37         | AF culture - | No  | Yes |

Abbreviations: PTL, preterm labor; PPROM, preterm premature rupture of membranes; AF, amniotic fluid; UT, uterine tenderness; VD, vaginal discharge.
