# Supplementary material for: The value of amniotic fluid analysis in patients with suspected clinical chorioamnionitis
Source: publisher site journal article supplement (doi:10.1515/jpm-2018-0306), 2019-02-28
Supplement: Supplementary file 2 [file Appendix 2 Clinical assessment only group.pdf › Appendix 2 Clinical assessment only group.pdf]

Appendix 2 Clinical assessment only group

| Case | Gestational age at presentation | Signs and symptoms at presentation  | Gestational age at delivery | Signs, symptoms and laboratory findings at delivery  | Histopathological chorioamnionitis | Justified management |
|------|---------------------------------|-------------------------------------|-----------------------------|------------------------------------------------------|------------------------------------|----------------------|
| 1    | 27 0/7                          | PTL, UT                             | 27 4/7                      | Maternal tachycardia, fever                          | Yes                                | Yes                  |
| 2    | 20 5/7                          | Fever, maternal tachycardia         | 40                          | Normal                                               | No                                 | Yes                  |
| 3    | 23 5/7                          | PPROM, UT, fever                    | 23 6/7                      | UT, fever                                            | Yes                                | Yes                  |
| 4    | 28 0/7                          | UT                                  | 38 5/7                      | Normal                                               | No                                 | Yes                  |
| 5    | 29 6/7                          | Fever, shortness of breath          | 37 4/7                      | Normal                                               | No                                 | Yes                  |
| 6    | 32 0/7                          | Pneumonia, fetal tachycardia, fever | 42                          | Normal                                               | No                                 | Yes                  |
| 7    | 32 0/7                          | PPROM, fetal tachycardia            | 32 0/7                      | Fetal tachycardia                                    | Yes                                | Yes                  |
| 8    | 25 3/7                          | PPROM, UT, fever                    | 28 3/7                      | Fever, fetal tachycardia (neonatal sepsis and death) | Yes                                | No                   |
| 9    | 32 5/7                          | PPROM, UT                           | 34 1/7                      | Fetal tachycardia, UT                                | No                                 | Yes                  |
| 10   | 23 0/7                          | PPROM, VD                           | 23 1/7                      | None (elective                                       | Yes                                | Yes                  |

|    |        |                                     |        |                                            |     |     |
|----|--------|-------------------------------------|--------|--------------------------------------------|-----|-----|
|    |        |                                     |        | termination                                |     |     |
| 11 | 23 1/7 | PPROM, VD                           | 24 0/7 | UT                                         | No  | No  |
| 12 | 28 4/7 | PPROM, VD                           | 28 6/7 | Fever                                      | Yes | Yes |
| 13 | 16 0/7 | PPROM, VD                           | 27 5/7 | Fever, fetal tachycardia (neonatal sepsis) | Yes | No  |
| 14 | 22 6/7 | PPROM, UT, fever                    | 23 0/7 | UT, fever                                  | Yes | Yes |
| 15 | 29 0/7 | PPROM, UT, fever, fetal tachycardia | 29 1/7 | UT, fever                                  | Yes | Yes |
| 16 | 31 3/7 | PPROM, UT                           | 31 6/7 | UT                                         | No  | Yes |
| 17 | 23 5/7 | PPROM, UT                           | 26 0/7 | UT (neonatal sepsis and death)             | Yes | No  |
| 18 | 30 2/7 | PPROM, maternal tachycardia         | 30 5/7 | UT, VD                                     | Yes | Yes |
| 19 | 27 0/7 | PPROM, vaginal bleeding, VD         | 31 0/7 | UT (maternal sepsis)                       | Yes | No  |
| 20 | 26 2/7 | PPROM, fever                        | 30 5/7 | IUGR                                       | No  | Yes |
| 21 | 37 0/7 | Fever, fetal tachycardia,           | 37 0/7 | Normal                                     | Yes | Yes |
| 22 | 29 5/7 | PPROM, vaginal bleeding, VD         | 30 5/7 | Fever, fetal tachycardia (neonatal sepsis) | Yes | No  |
| 23 | 25 3/7 | PPROM, VD                           | 27 1/7 | Fever, fetal tachycardia                   | Yes | No  |

|    |        |                                  |        |                                           |     |     |
|----|--------|----------------------------------|--------|-------------------------------------------|-----|-----|
| 24 | 32 0/7 | UT                               | 39 4/7 | Normal                                    | No  | Yes |
| 25 | 23 1/7 | UT                               | 39 3/7 | Normal                                    | No  | Yes |
| 26 | 17 3/7 | PPROM, UT                        | D&E    | UT, VD                                    | Yes | Yes |
| 27 | 30 3/7 | PPROM, VD                        | 31 1/7 | Fever, fetal tachycardia                  | Yes | Yes |
| 28 | 26 6/7 | PPROM, VD, UT                    | 27 1/7 | Fever, fetal tachycardia                  | Yes | Yes |
| 29 | 25 5/7 | PPROM, VD                        | 30 5/7 | UT                                        | Yes | No  |
| 30 | 30 4/7 | PPROM, VD                        | 31 0/7 | UT, fever                                 | Yes | Yes |
| 31 | 28 5/7 | PPROM, VD                        | 32 6/7 | Labor                                     | Yes | No  |
| 32 | 24 5/7 | PPROM, VD                        | 25 0/7 | Fever                                     | Yes | Yes |
| 33 | 35 0/7 | Fetal tachycardia, gastroschisis | 35 0/7 | Suspected small bowel obstruction         | No  | No  |
| 34 | 32 1/7 | PPROM, polyhydramnios, VD        | 32 2/7 | Maternal tachycardia, UT (neonatal death) | No  | No  |

Abbreviations: PTL, preterm labor; PPROM, preterm premature rupture of membranes; D&E, dilation and evacuation; UT, uterine tenderness; VD, vaginal discharge; IUGR, intrauterine growth restriction.
