# Supplementary material for: The value of amniotic fluid analysis in patients with suspected clinical chorioamnionitis
Source: publisher site journal article supplement (doi:10.1515/jpm-2018-0306), 2019-02-28
Supplement: Supplementary file 3 [file List of Abbreviations.pdf › List of Abbreviations.pdf]

**List of Abbreviations:**

-AF, amniotic fluid

-D&E, dilation and evacuation

-IGFBP, insulin-like growth factor-binding protein

-IL, interleukin

-IUGR, intrauterine growth restriction

-LDH, lactate dehydrogenase

-MCP-1, monocyte chemoattractant protein-1

-MMP-8, matrix metalloproteinase-8

-PCR, polymerase chain reaction

-PPROM, preterm premature rupture of membranes

-PTL, preterm labor

-UT, uterine tenderness

-TPL, threatened preterm labor

-VD, vaginal discharge

-WBC, white blood cell count
